# Supplementary material for: Dynamic Support Culture of Murine Skeletal Muscle-Derived Stem Cells Improves Their Cardiogenic PotentialIn Vitro
Source: Hindawi journal article supplement (doi:10.1155/2015/247091), 2015-01-01
Supplement: f1 [file 247091.f1.pdf]

### **Supplementary Figure 1: Skeletal muscle marker expression analysis.**

Cells from ISH0 and after twelve days of culture under different conditions were immunocytochemically analyzed for the expression of cardiac markers. Quantification of microscopically assessed expression data is displayed in Figure 3. The panel is divided into cluster staining (upper row) and single cell staining (lower row) pictures. Cells were stained against: Desmin, Pax7, Myf3 and Myf4. Scale: 50  $\mu$ m.

### **Supplementary Figure 2: Cardiac muscle marker expression analysis and quantification of non-adherent cells under different culture conditions.**

Cells from ISH0 and after twelve days of culture under different conditions were immunocytochemically analyzed for the expression of cardiac markers. Quantification of microscopically assessed expression data is displayed in Figure 3. The panel is divided into cluster staining (upper row) and single cell staining (lower row) pictures. Cells were stained against: ACTN2, cTnT, GATA4 and Nkx2.5. Scale: 50  $\mu$ m.

### **Supplementary Figure 3: Antibody specificity control staining**

Different control cell types were stained against the indicated markers to verify the specificity of labeling of the target antigen by the primary antibody. The presence of signals in positive control cells and their absence in negative control cells was understood as proper binding of the given antibody. Cross-reactivity was excluded by specific signals in heterogeneous cell populations, e.g. myoblasts including fibroblasts (see Pax7 staining). Cells were stained against: Desmin, Pax7, Myf3 and Myf4, ACTN2, cTnT, Gata4 and Nkx2.5. Scale: 50  $\mu$ m.

**Supplementary Figure 4: Immunocytochemical analysis of ISH0 cells including control staining**

Cells from ISH0 were immunocytochemically analyzed for the expression of the indicated markers as previously shown in Supplementary Figure 1 and 2. Shown here in addition are antibody reactivity and background fluorescence and binding control stainings including isotype control plus secondary antibody (Isotype + 2nd Ab) or secondary antibody alone (2nd Ab alone) in contrast to single cell and cluster stainings. Cells were stained against: Desmin, Pax7, Myf3 and Myf4, ACTN2, cTnT, Gata4 and Nkx2.5. Scale: 50  $\mu$ m.

**Supplementary Figure 5: Immunocytochemical analysis of I12 cells including control staining**

Cells from I12 were immunocytochemically analyzed for the expression of the indicated markers as previously shown in Supplementary Figure 1 and 2. Shown here in addition are antibody reactivity and background fluorescence and binding control stainings including isotype control plus secondary antibody (Isotype + 2nd Ab) or secondary antibody alone (2nd Ab alone) in contrast to single cell and cluster stainings. Cells were stained against: Desmin, Pax7, Myf3 and Myf4, ACTN2, cTnT, Gata4 and Nkx2.5. Scale: 50  $\mu$ m.

**Supplementary Figure 6: Immunocytochemical analysis of S12 cells including control staining**

Cells from S12 were immunocytochemically analyzed for the expression of the indicated markers as previously shown in Supplementary Figure 1 and 2. Shown here in addition are antibody reactivity and background fluorescence and binding control stainings including isotype control plus secondary antibody (Isotype + 2nd Ab) or secondary antibody alone (2nd Ab alone)

in contrast to single cell and cluster stainings. Cells were stained against: Desmin, Pax7, Myf3 and Myf4, ACTN2, cTnT, Gata4 and Nkx2.5. Scale: 50  $\mu$ m.

**Supplementary Figure 7: Immunocytochemical analysis of H12 cells including control staining**

Cells from H12 were immunocytochemically analyzed for the expression of the indicated markers as previously shown in Supplementary Figure 1 and 2. Shown here in addition are antibody reactivity and background fluorescence and binding control stainings including isotype control plus secondary antibody (Isotype + 2nd Ab) or secondary antibody alone (2nd Ab alone) in contrast to single cell and cluster stainings. Cells were stained against: Desmin, Pax7, Myf3 and Myf4, ACTN2, cTnT, Gata4 and Nkx2.5. Scale: 50  $\mu$ m.

**Supplementary Figure 8: Expression of cardiomyocyte specific transcripts in MDSC derived cells.**

Skeletal myoblasts (MB), purified ESC derived CM and cells from I, S and H cell culture conditions on day 4 and 12 of cultivation were analyzed by qPCR. Expression levels of indicated genes are displayed as  $\Delta$ Ct values relative to the housekeeping control gene  $\beta$ -actin (n=5).

**Supplementary Figure 9: Spontaneous activity of MDSCs before conditional culture and under pharmacological stimulation**

Spontaneous activity of MDSCs at day 0 measured by current-clamp whole cell patch clamping (**A+B**). Left panels in **A** (irregular activity) and **B** (regular activity) show the full trace of a 5 minute measurement. Right panels in **A** and **B** show magnifications of a one second stretch of activity. Spontaneous activity was measured at day 12 under pharmacological stimulation (**C+D**). The left panel shows a full 5 second trace before the application of 0.5 mM CdCl<sub>2</sub> (**C**) or 1 μM isoproterenol (**D**); the right panel shows a full 5 second trace 30 seconds after application. Scales are labeled accordingly.

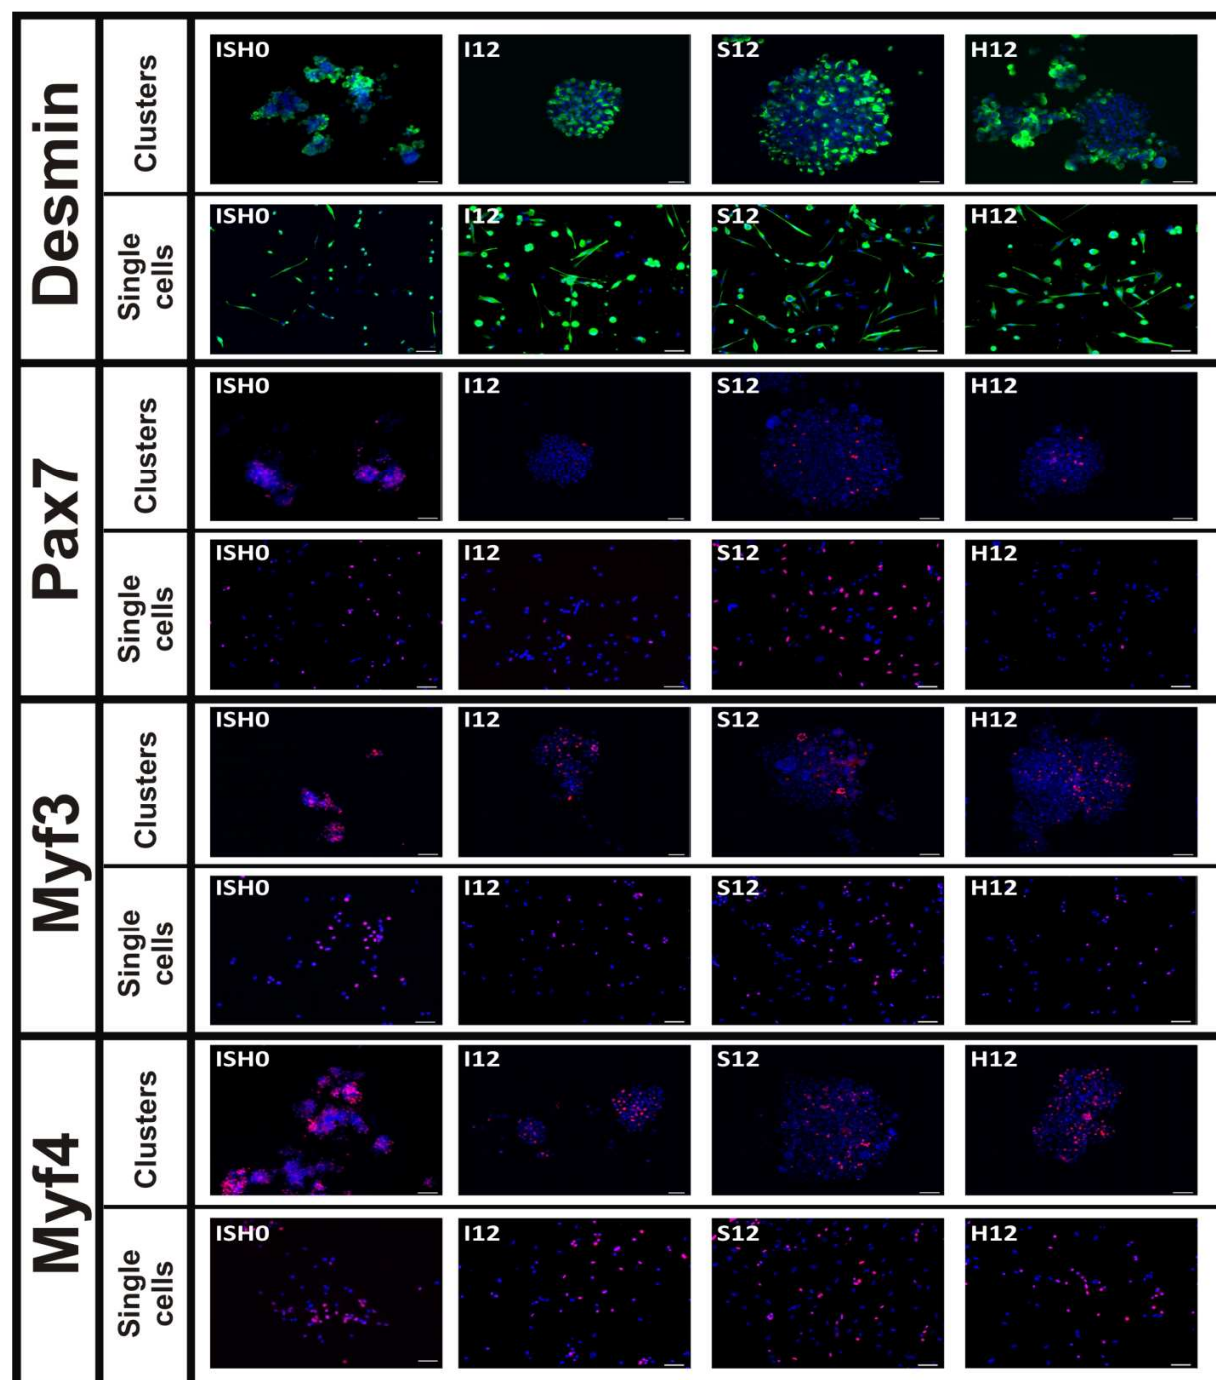

Supplemental Figure 1

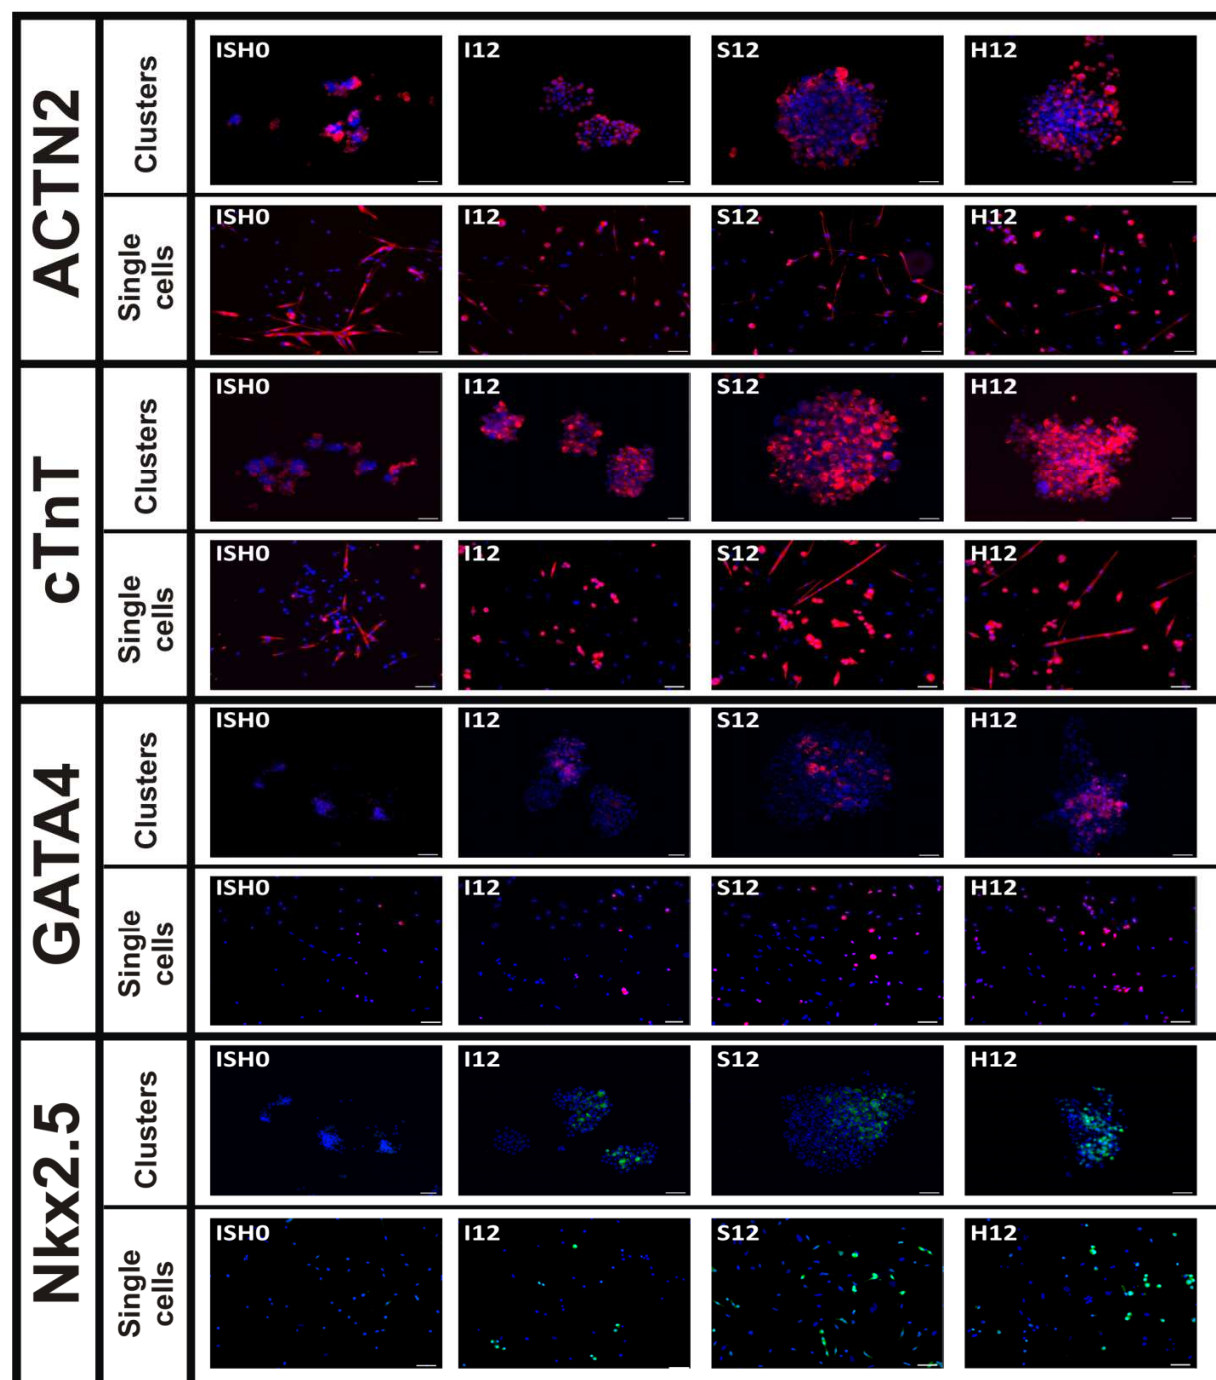

Supplemental Figure 2

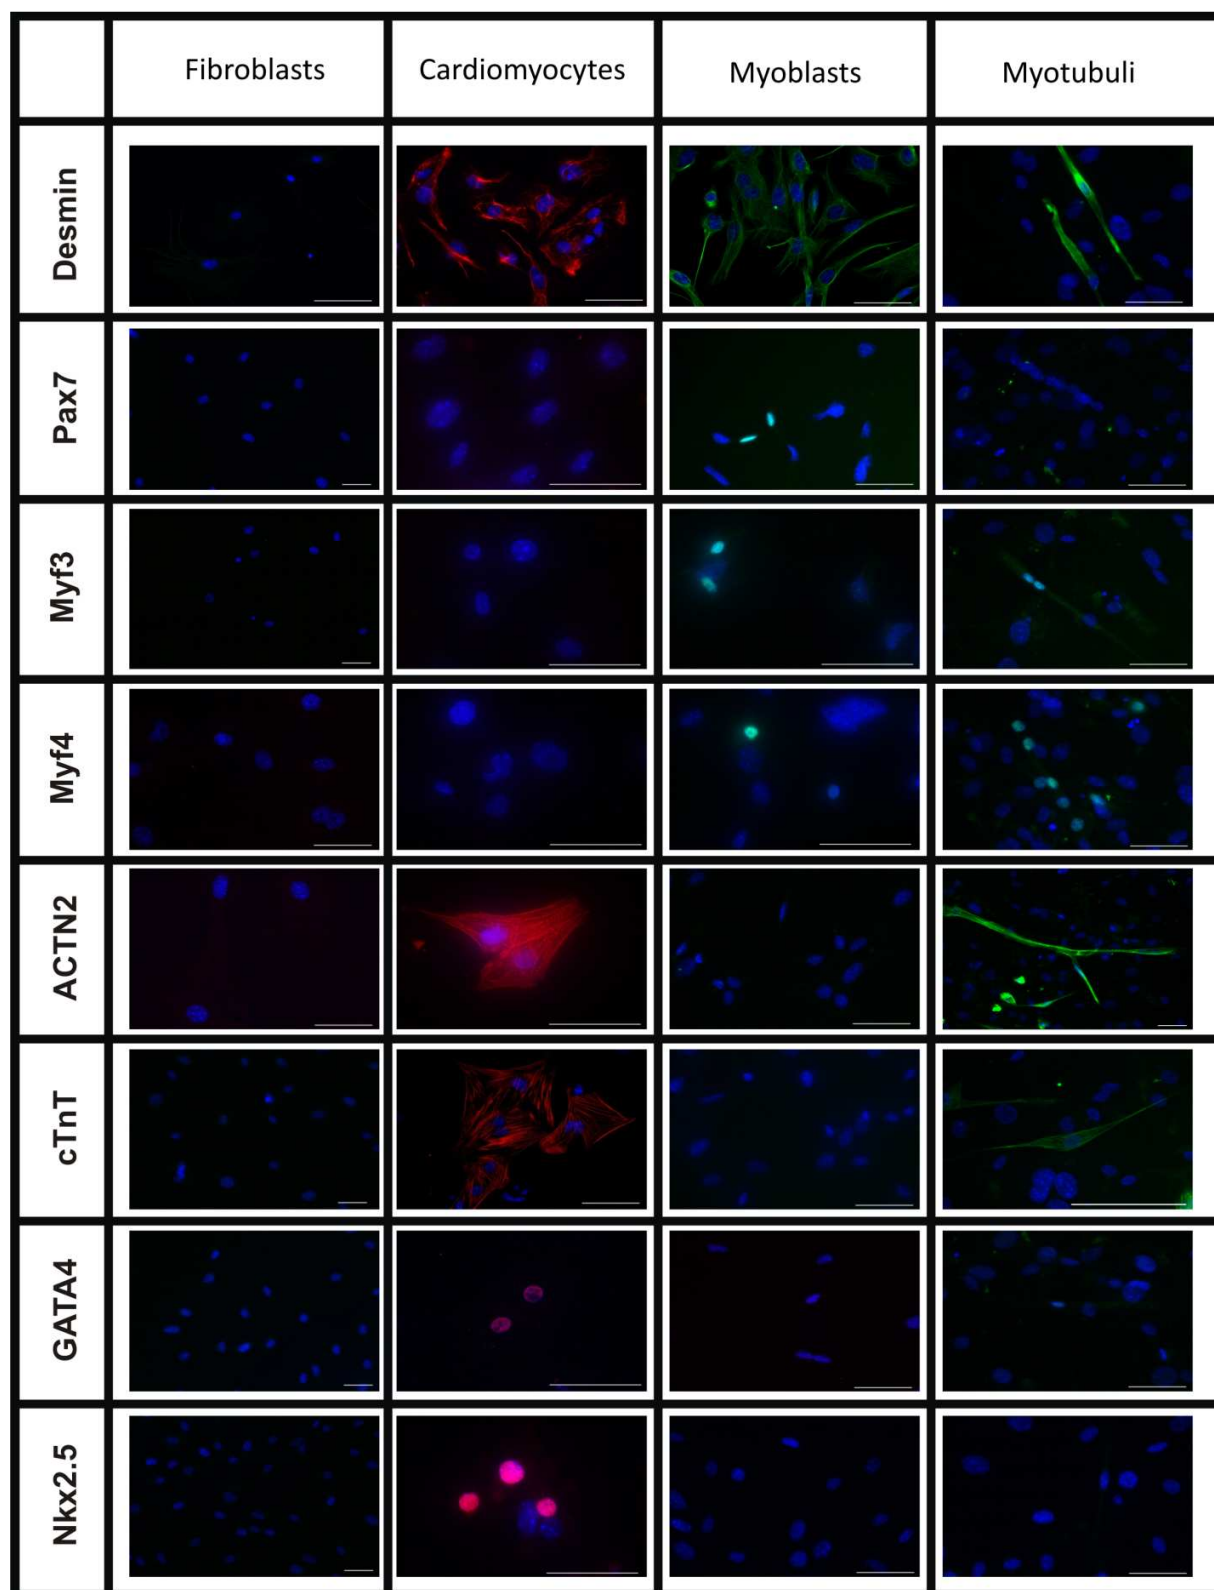

Supplemental Figure 3

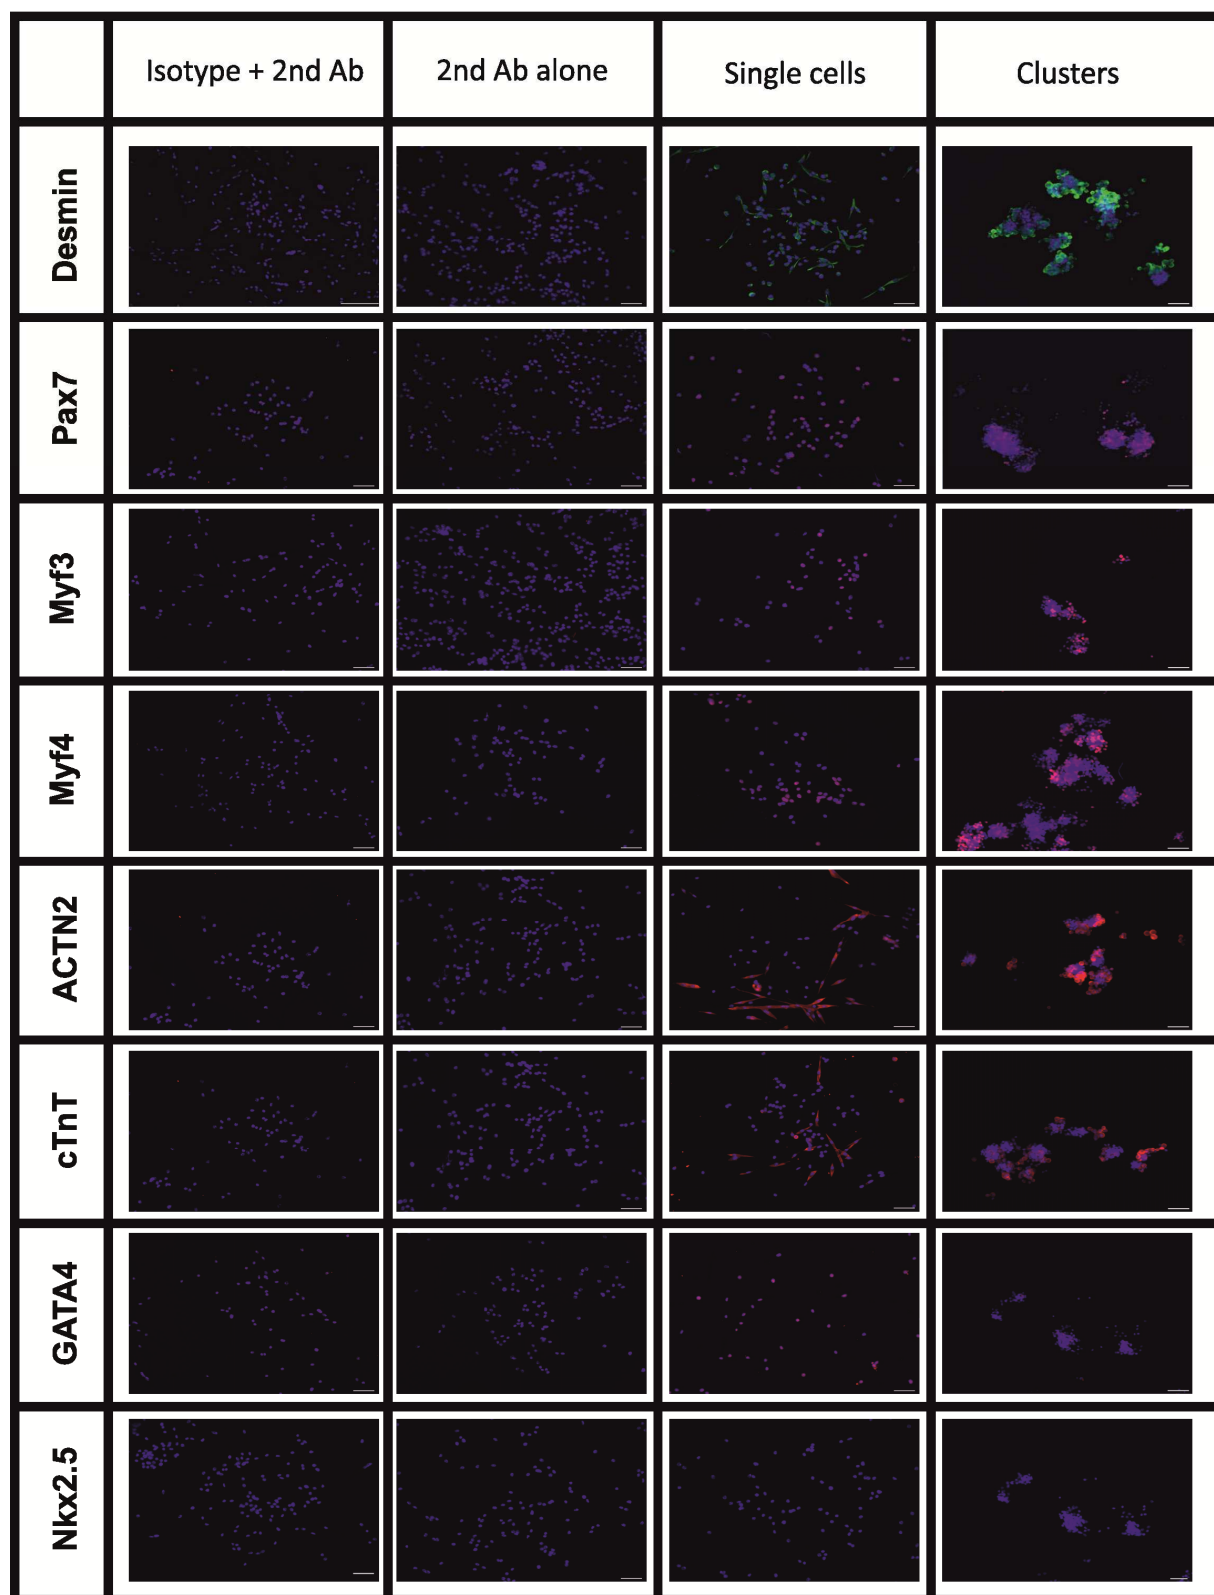

Supplemental Figure 4



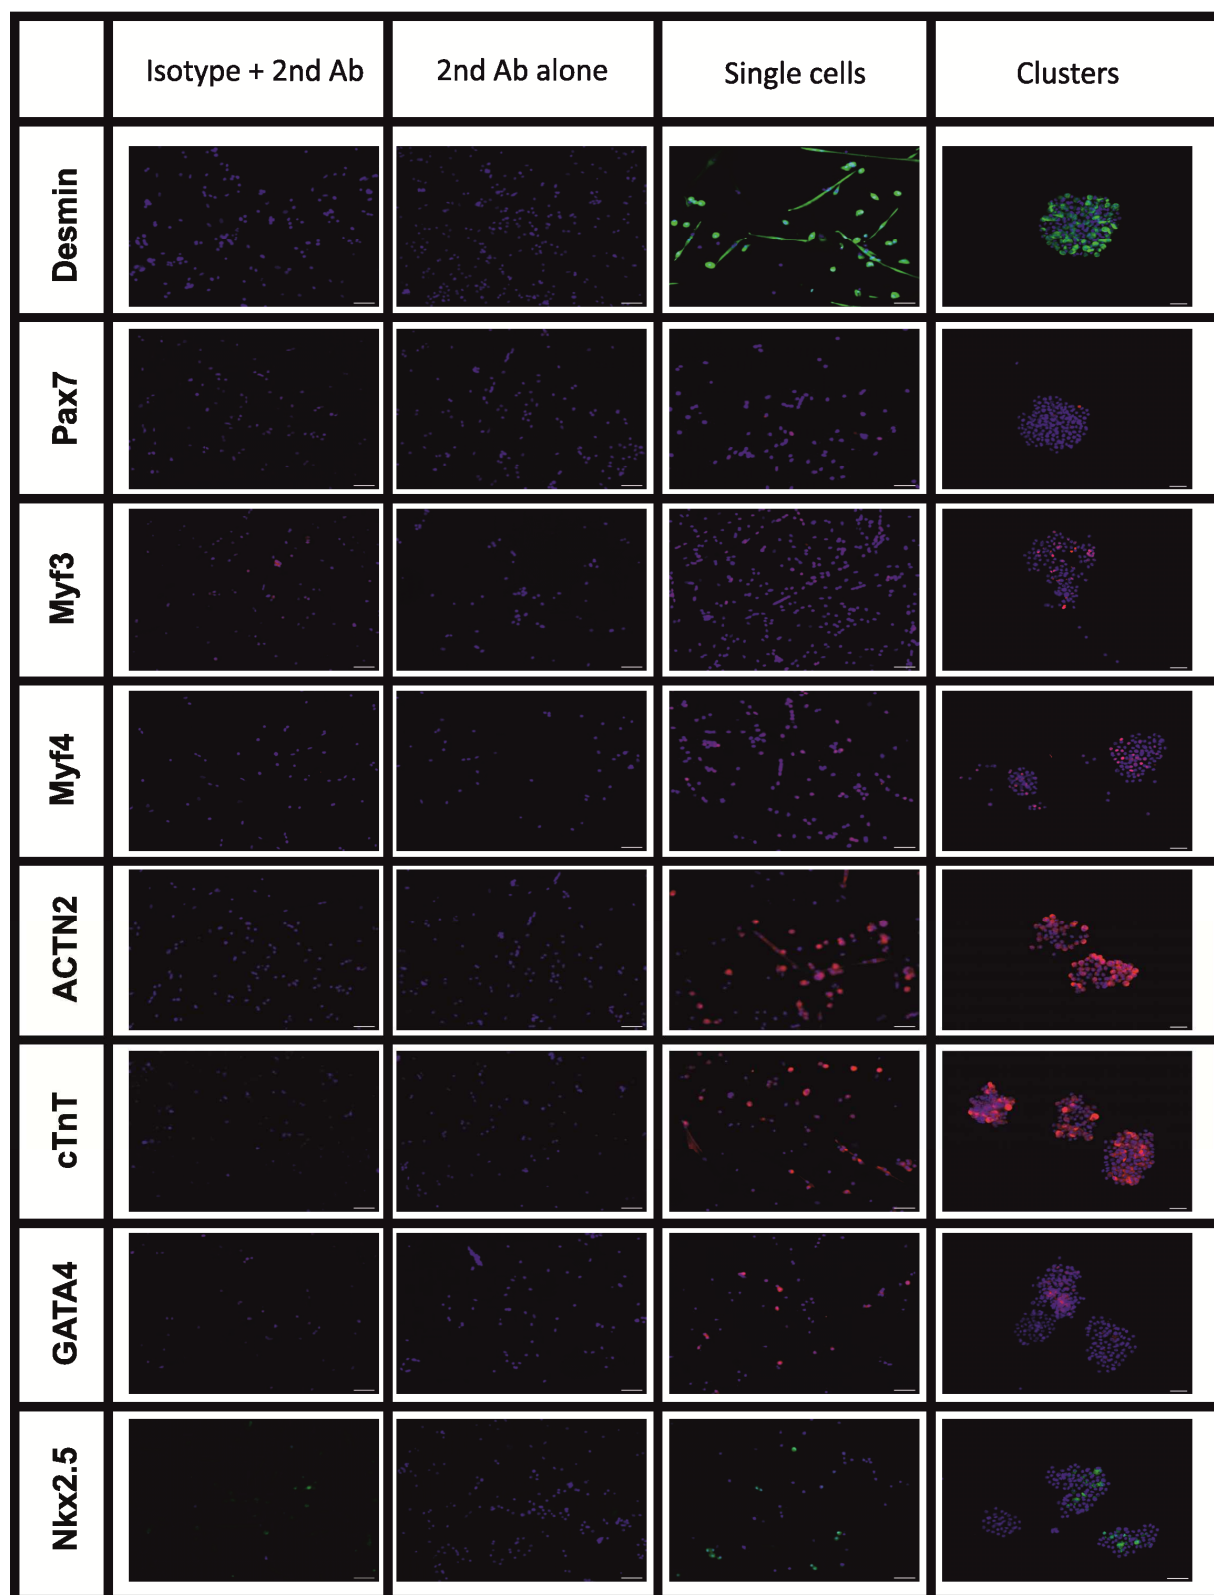

Supplemental Figure 5

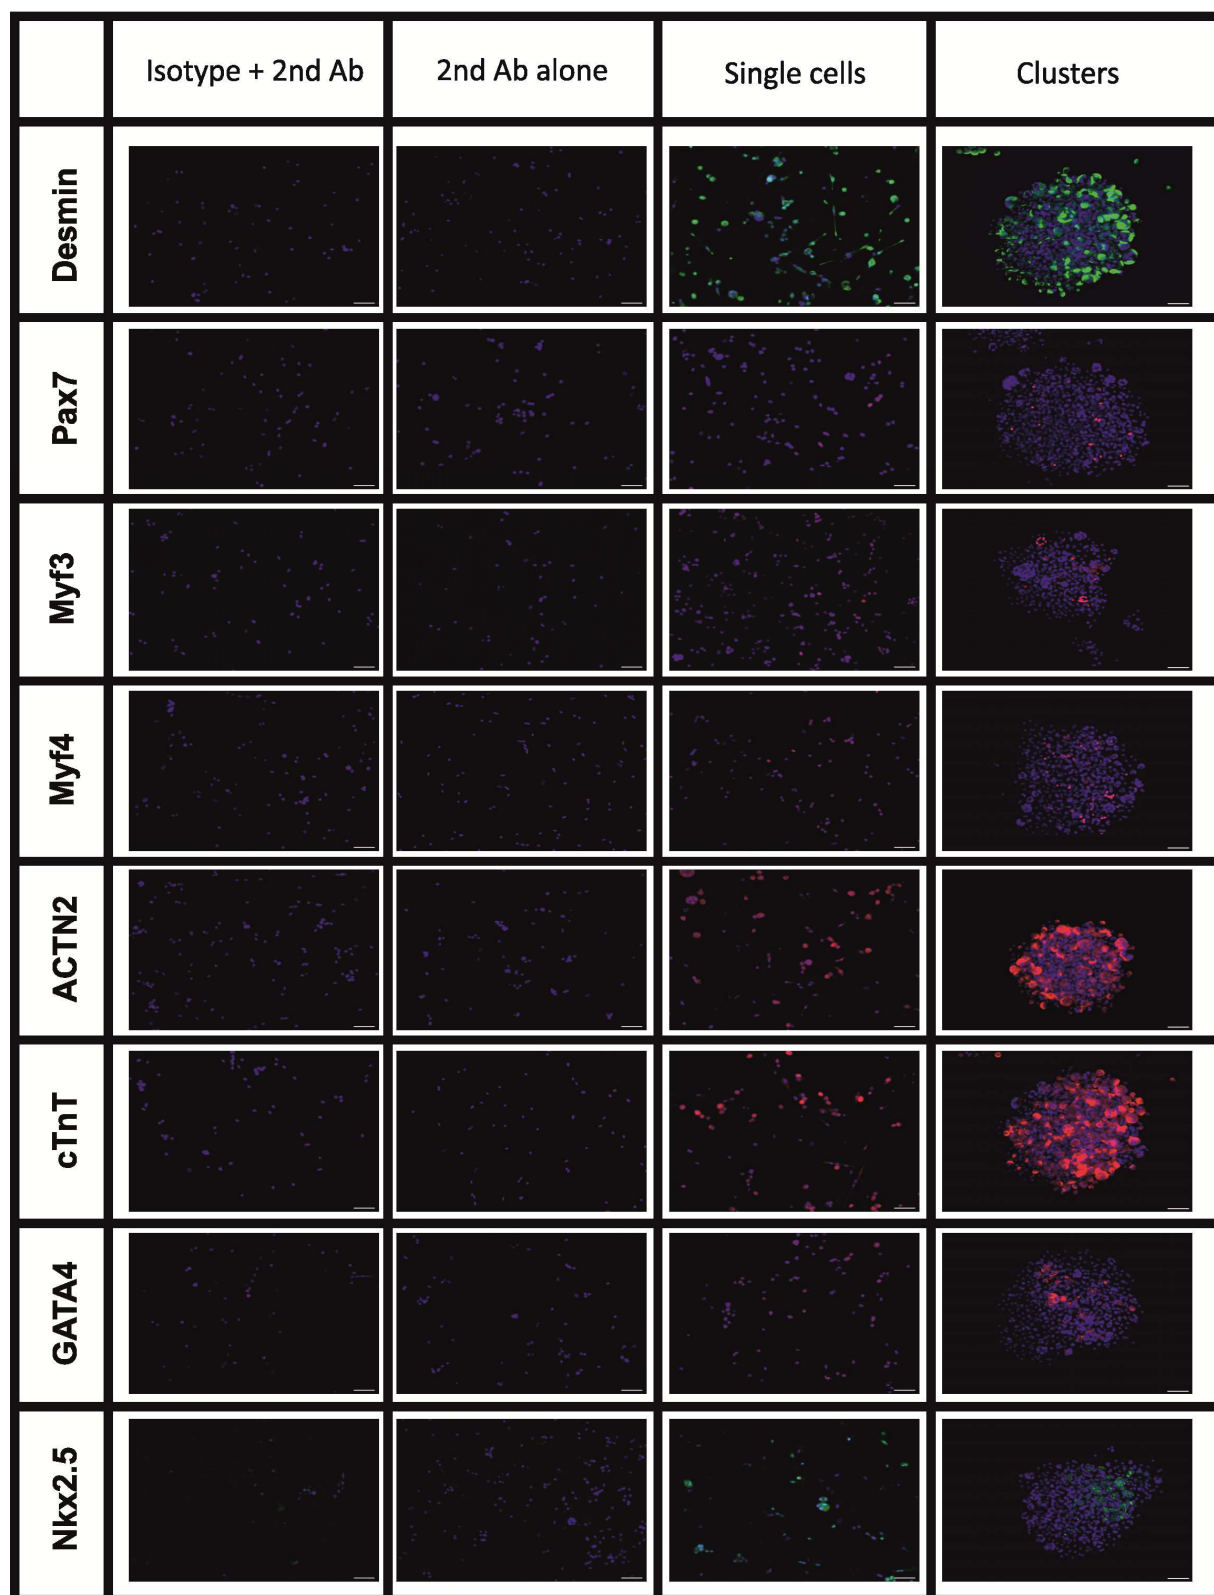

Supplemental Figure 6

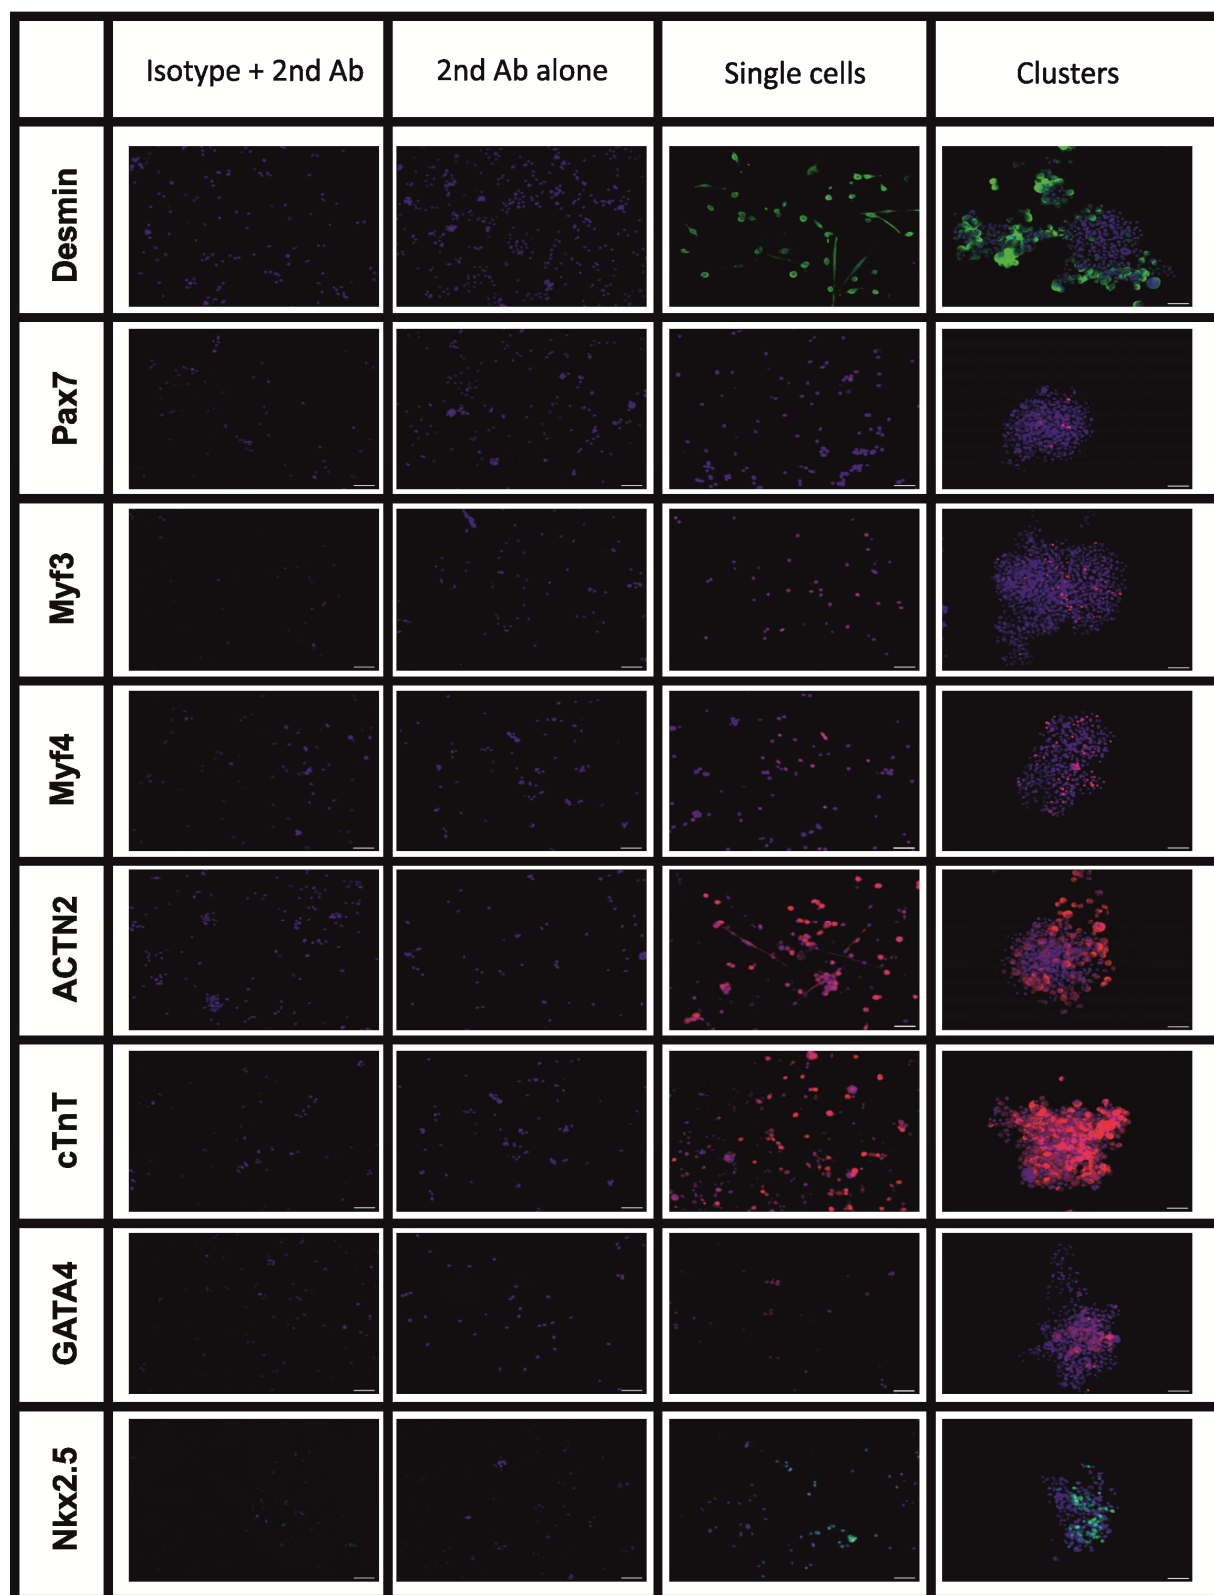

Supplemental Figure 7

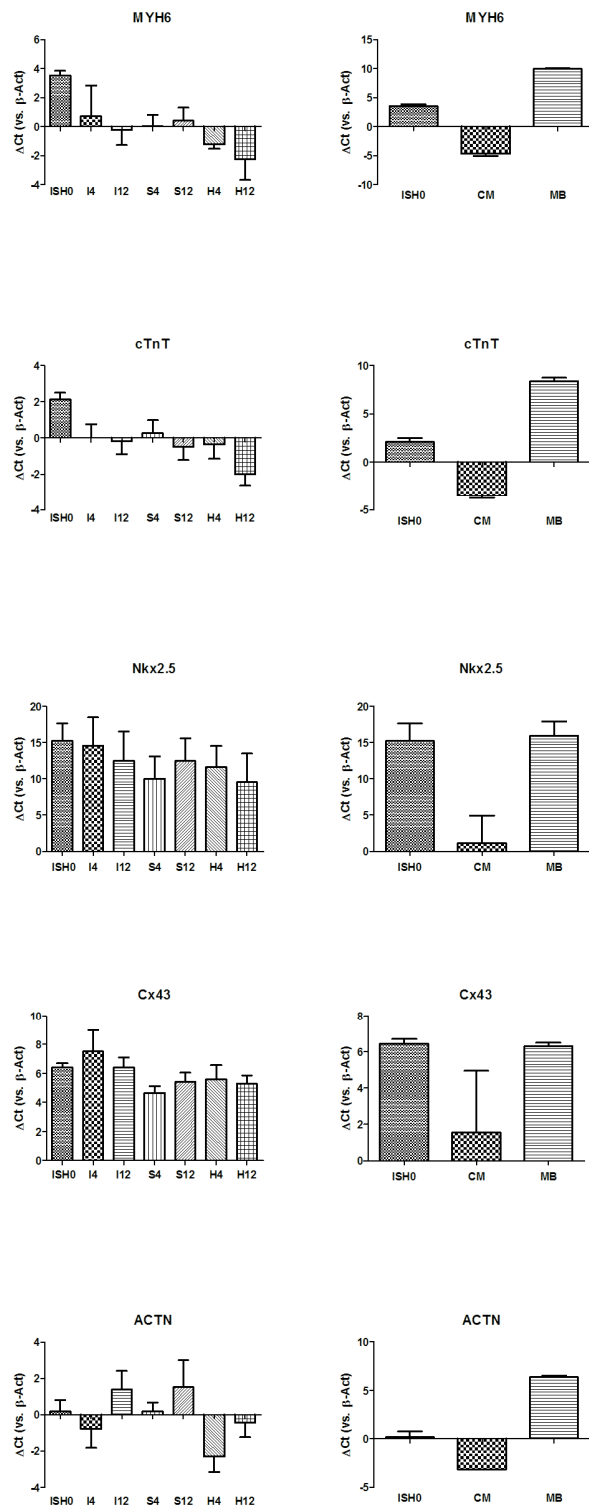

**Supplemental Figure 8**

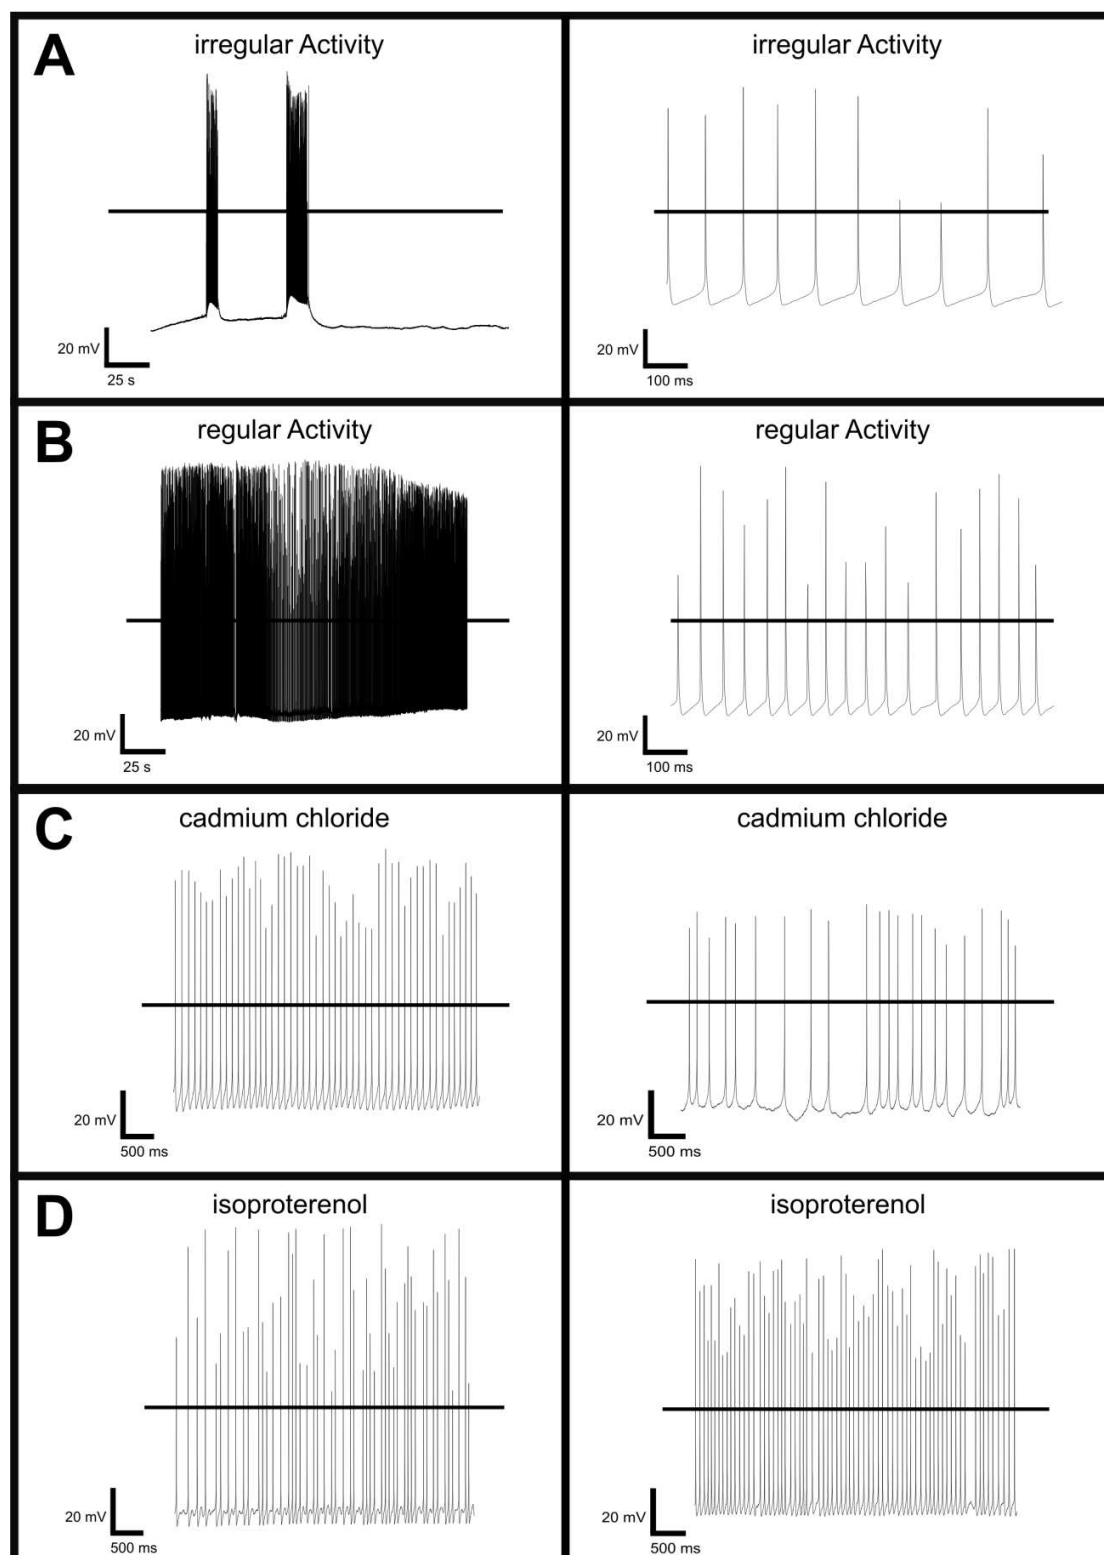

Supplemental Figure 9

**Supplementary Table 1: Primary and secondary antibodies used for immunological staining and flow cytometry.**

| Antibody         | Company               | Conjugation | Species | Reactivity | Dilution |
|------------------|-----------------------|-------------|---------|------------|----------|
| Desmin           | Gene Tex (GTX15200)   | x           | Rabbit  | Mouse      | 1:200    |
| cTnT             | Santa Cruz (sc-20025) | x           | Mouse   | Mouse      | 1:200    |
| Gata4            | Santa Cruz (sc-25310) | x           | Mouse   | Mouse      | 1:200    |
| Pax7             | Santa Cruz (sc-81648) | x           | Mouse   | Mouse      | 1:200    |
| Nkx2.5           | Santa Cruz (sc-14033) | x           | Rabbit  | Mouse      | 1:200    |
| $\alpha$ -ACT    | Sigma (A7811)         | x           | Mouse   | Mouse      | 1:500    |
| Myf3             | Abcam (ab16148)       | x           | Mouse   | Mouse      | 1:200    |
| Myf4             | Abcam (ab1835)        | x           | Mouse   | Mouse      | 1:200    |
| Sca-1            | BD (553336)           | PE          | Rat     | Mouse      | 1:800    |
| CD34             | Biolegend (119307)    | FITC        | Rat     | Mouse      | 1:400    |
| IgG-Isotype      | Santa Cruz (sc-2025)  | x           | Mouse   | x          | 1:100    |
| IgG-Isotype      | Santa Cruz (sc-2027)  | x           | Rabbit  | x          | 1:100    |
| IgG2a-Isotype    | BD (553930)           | PE          | Rat     | x          | 1:200    |
| IgG2a-Isotype    | Biolegend (400507)    | FITC        | Rat     | x          | 1:200    |
| Alexa Fluor® 488 | Invitrogen (A11001)   | AF488       | Goat    | Mouse      | 1:1000   |
| Alexa Fluor® 488 | Invitrogen (A11008)   | AF488       | Goat    | Rabbit     | 1:1000   |
| Alexa Fluor® 568 | Invitrogen (A11004)   | AF568       | Goat    | Mouse      | 1:1000   |
| Alexa Fluor® 568 | Invitrogen (A11011)   | AF568       | Goat    | Rabbit     | 1:1000   |
| DAPI             | Invitrogen (D3571)    | x           | x       | x          | 1:1000   |

**Supplementary Table 2: Primers used for quantitative RT-PCR.**

| Gene   | NCBI Reference-Sequence | forward / reverse | Sequence                  |
|--------|-------------------------|-------------------|---------------------------|
| b-Act  | NM_007393.3             | F                 | AGGTCATCACTATTGGCAACGA    |
|        |                         | R                 | CAACGTCACACTTCATGATGGA    |
| Nkx2.5 | NM_008700.2             | F                 | CACCGCGTCGCCACCATGTTCCCCA |
|        |                         | R                 | CGGGGCGCCCCAAACGGGCT      |
| MHC6   | NM_001164171.1          | F                 | GCTGGAAGATGAGTGCTCAGAG    |
|        |                         | R                 | CCAGCCATCTCCTCTGTTAGGT    |
| ACTN2  | NM_134156.2             | F                 | TCGCCAAGTGTCACGCTCGTT     |
|        |                         | R                 | GGTCGATGGTTTCCAGCAGCTT    |
| Cx43   | NM_010288.3             | F                 | CTCCTCCTGGGTACAAGCTG      |
|        |                         | R                 | TAAGGGCTGGAGTTCTGTGTC     |
| cTnT   | NM_011619.2             | F                 | GCTACAGACTCTGATCGAGGCT    |
|        |                         | R                 | GCTCATTGCGAATACGCTGCTG    |

**Supplementary Table 3 A: Composition of patch clamp pipette solutions.**

| Type                     | Reagent                              | Company | Concentration [mM] |
|--------------------------|--------------------------------------|---------|--------------------|
| <b>Sodium / Calcium</b>  | NaCl                                 | Roth    | 120                |
|                          | MgCl <sub>2</sub> *6H <sub>2</sub> O | Merck   | 1                  |
|                          | KCl                                  | Merck   | 5                  |
|                          | TEA-Cl                               | Sigma   | 20                 |
|                          | CaCl <sub>2</sub> *2H <sub>2</sub> O | Merck   | 3.6                |
|                          | Hepes                                | Sigma   | 10                 |
|                          | TEA-OH                               | Sigma   | ad. pH 7.4         |
| <b>Potassium</b>         | NMG-Cl                               | Sigma   | 135                |
|                          | MgCl <sub>2</sub> *6H <sub>2</sub> O | Merck   | 1                  |
|                          | KCl                                  | Merck   | 5                  |
|                          | CaCl <sub>2</sub> *2H <sub>2</sub> O | Merck   | 3.6                |
|                          | NiCl <sub>2</sub>                    | Merck   | 3                  |
|                          | Hepes                                | Sigma   | 10                 |
|                          | NMG                                  | Sigma   | ad. pH 7.4         |
| <b>Action Potentials</b> | NaCl                                 | Roth    | 140                |
|                          | MgCl <sub>2</sub> *6H <sub>2</sub> O | Merck   | 1                  |
|                          | KCl                                  | Merck   | 5.4                |
|                          | CaCl <sub>2</sub> *2H <sub>2</sub> O | Merck   | 1.8                |
|                          | D-Glucose                            | Sigma   | 5                  |
|                          | Hepes                                | Sigma   | 10                 |
|                          | NaOH                                 | Sigma   | ad. pH 7.4         |

**Supplementary Table 3 B: Composition of external patch clamp solutions.**

| Type                          | Reagent                              | Company | Concentration [mM] |
|-------------------------------|--------------------------------------|---------|--------------------|
| Sodium / Calcium              | CsCl                                 | Fluka   | 120                |
|                               | MgCl <sub>2</sub> *6H <sub>2</sub> O | Merck   | 3                  |
|                               | MgATP                                | Sigma   | 5                  |
|                               | EGTA                                 | Fluka   | 10                 |
|                               | Hepes                                | Sigma   | 5                  |
|                               | CsOH                                 | Sigma   | ad. pH 7.4         |
| Action Potentials / Potassium | MgCl <sub>2</sub> *6H <sub>2</sub> O | Merck   | 1                  |
|                               | KCl                                  | Merck   | 50                 |
|                               | Hepes                                | Sigma   | 10                 |
|                               | EGTA                                 | Fluka   | 10                 |
|                               | MgATP                                | Sigma   | 3                  |
|                               | K-Aspartate                          | Sigma   | 80                 |
|                               | KOH                                  | Fluka   | ad. pH 7.4         |
